# Supplementary material for: Adamantane-Functionalized Phthalimide Scaffold: Pathways to Supramolecular Interactions and Drug Discovery
Source: MDPI journal article supplement (doi:10.3390/org2040022), 2021-11-11
Supplement: s1 [file s1]

Article

# Adamantane-functionalized phthalimide scaffold: pathway to supramolecular interactions

Hamidou Keita\*

Department of Chemistry, Clemson University, Clemson, SC 29634, United States  
Email: hkeita@g.clemson.edu

## Synthesis of AcidBr

1,2-dibromo O-xylene 200mg (0.757mmol) was dispersed in 3.6ml pyridine and 6ml water mixture. Then 473mg  $\text{KMnO}_4$  (2.99mmol, 3.95eq) was added to it and reflux for 2hr. After which 945mg  $\text{KMnO}_2$  was added several times (7x) and the reaction was kept refluxing overnight. After 16hrs, the mixture was filtered while hot and the residue washed with hot water. The filtrate was reduced under vacuum to remove the pyridine and the remaining solution was acidified with conc. HCl to form a white precipitate which was filtered and dried. Yield 208mg, 85%. Because of limited solubility of the product in organic solvent, a satisfactory NMR could not be obtained. ATR-IR:  $\nu$  3091 (vw), 2904 (vw), 2791 (vw), 2616 (vw), 2516 (vw), 1700 (s), 1515 (w), 1408 (w), 1289 (m), 1239(s), 1158 (w), 1077 (m), 876 (m), 816 (w), 776 (m), 701(w), 607 (vw).

## Appendix A: NMR spectra of AdBr and its precursors.

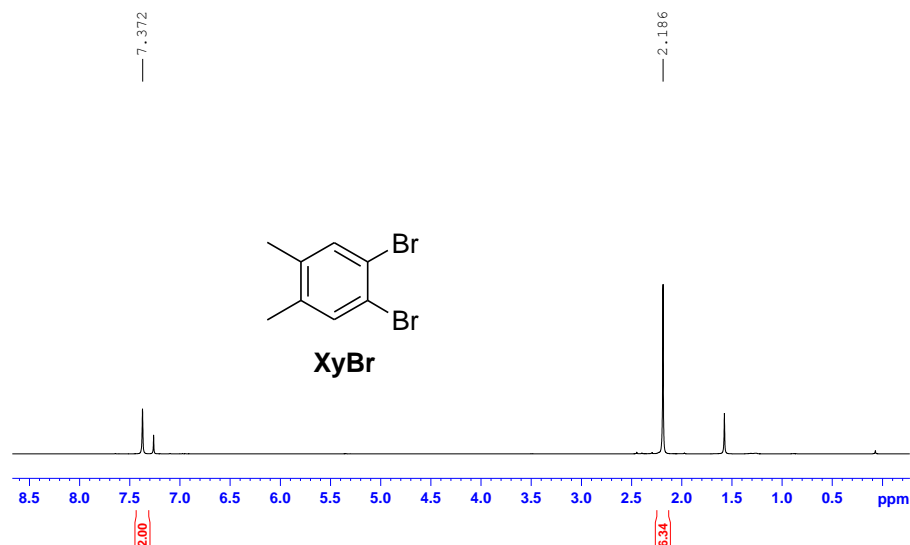

**Figure A1.**  $^1\text{H}$ -NMR ( $\text{CDCl}_3$ ) spectrum of XyBr.

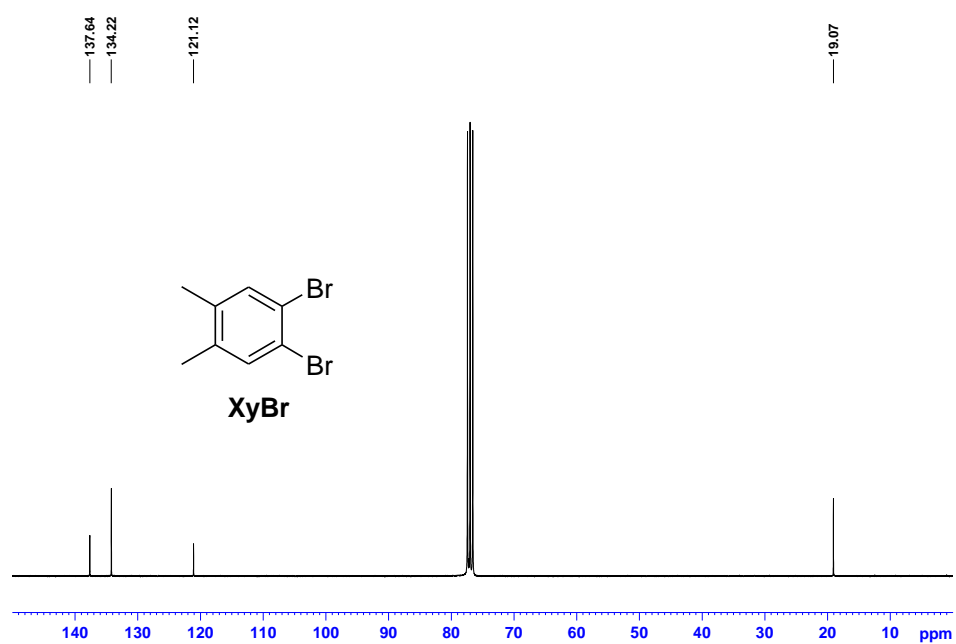

Figure A2. <sup>13</sup>C-NMR (CDCl<sub>3</sub>) spectrum of XyBr.

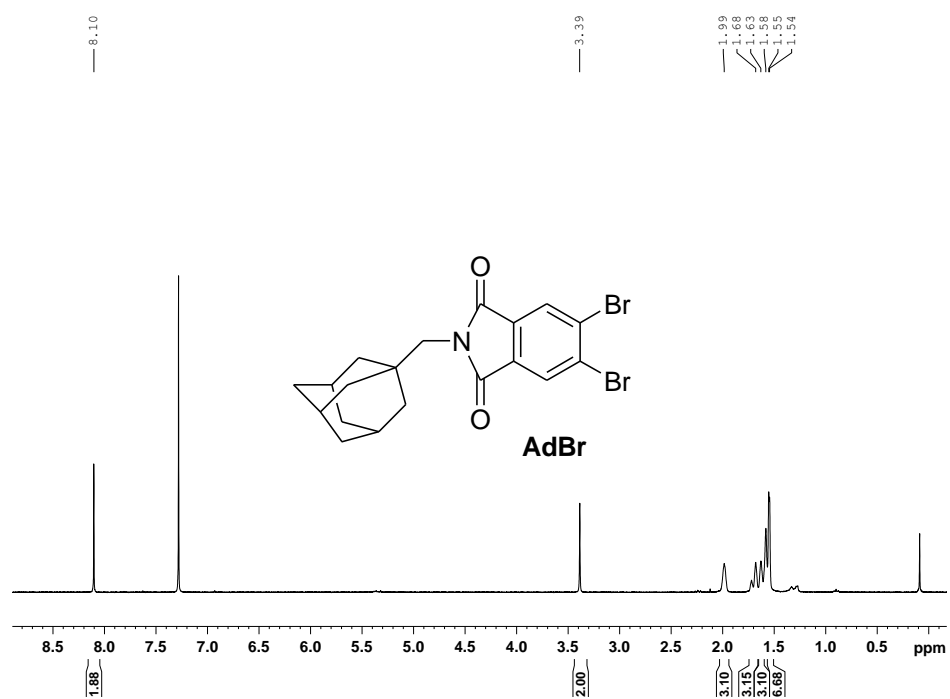

Figure A3. <sup>1</sup>H-NMR (CDCl<sub>3</sub>) spectrum of AdBr.

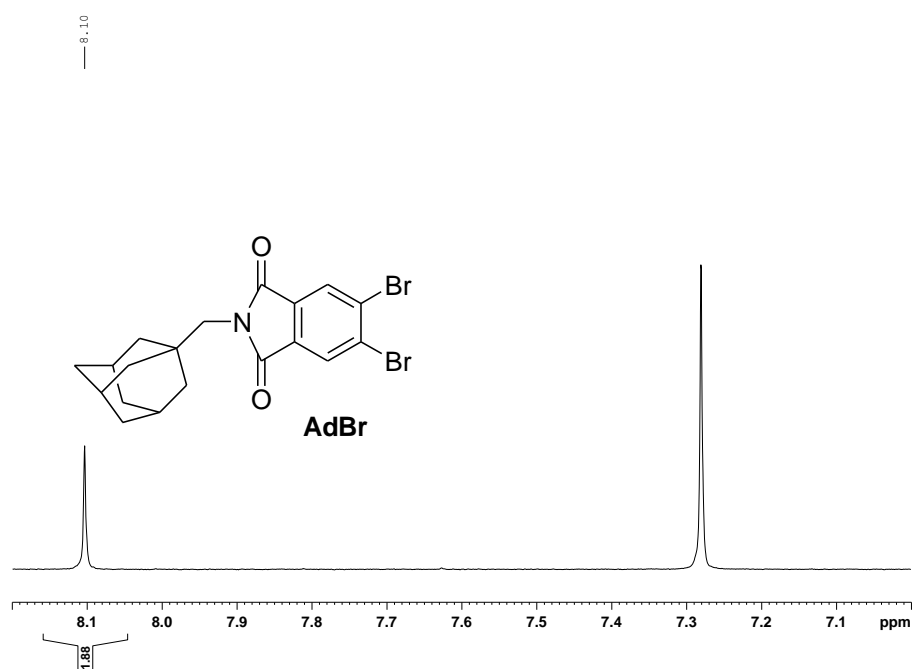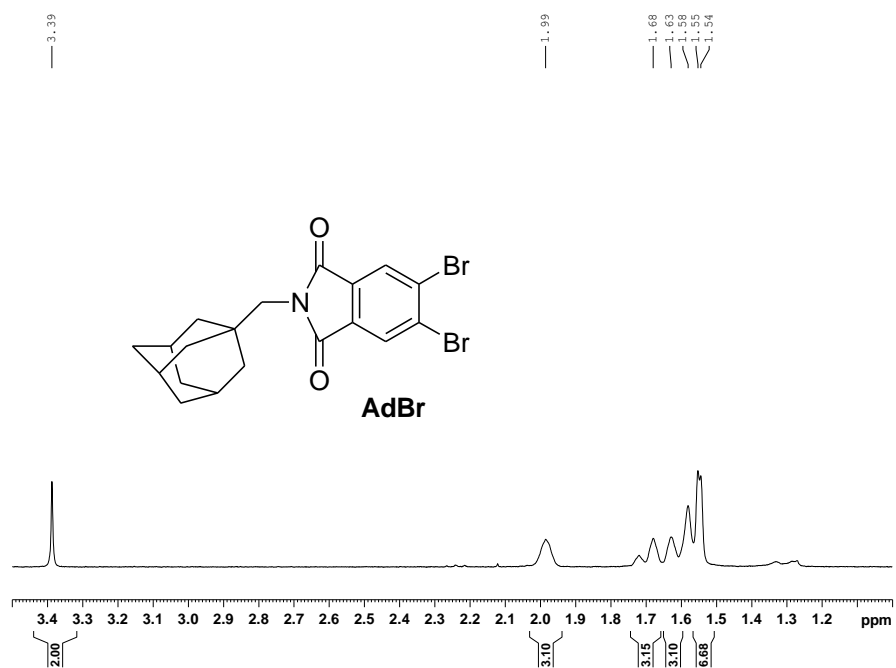

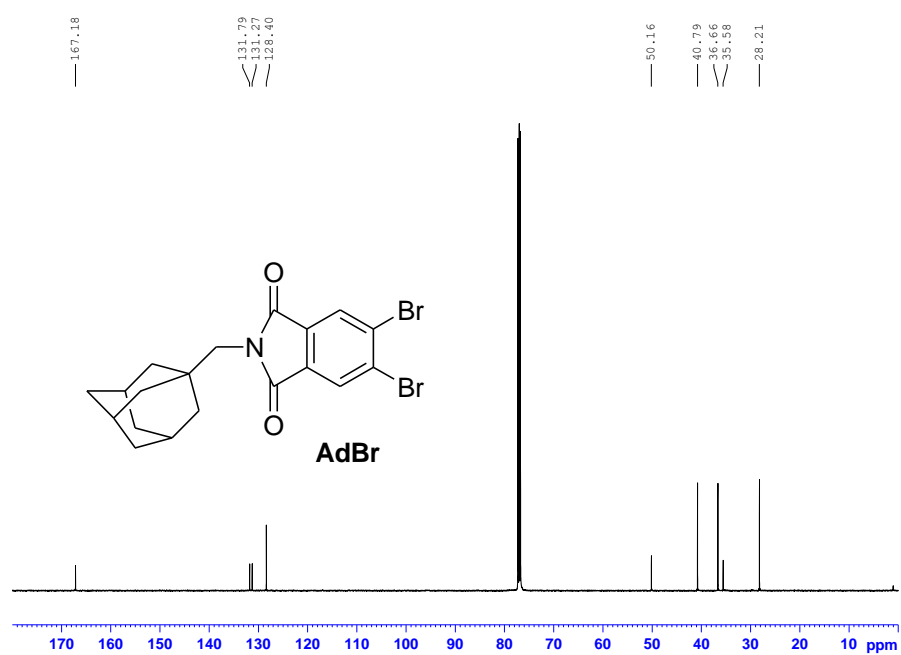

Figure A4.  $^{13}\text{C}$ -NMR ( $\text{CDCl}_3$ ) spectrum of AdBr.

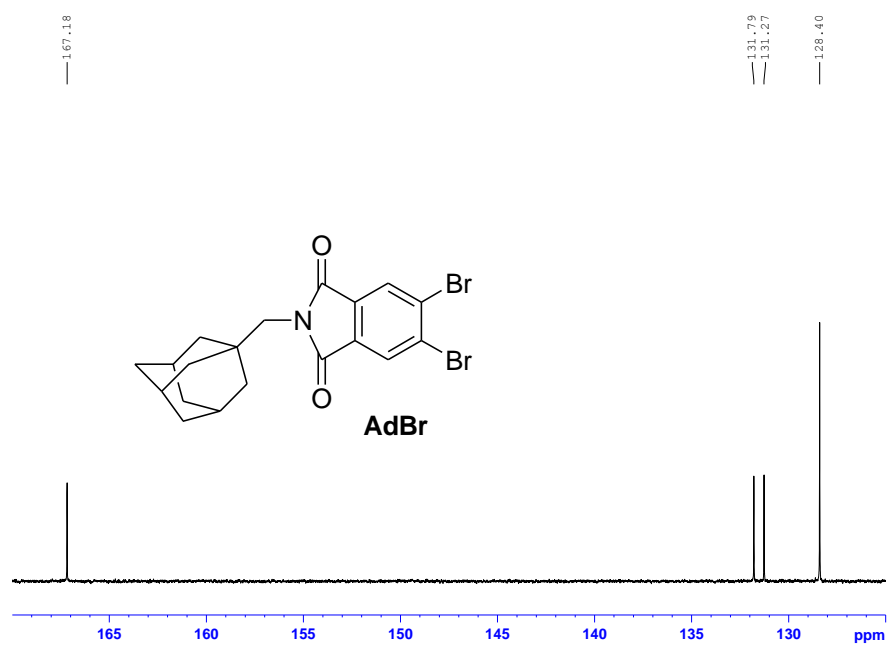

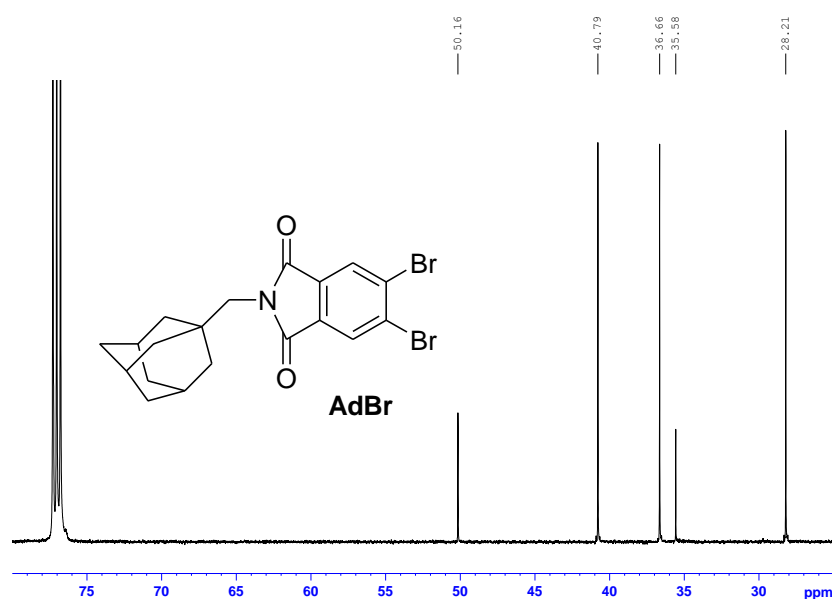

### **C<sub>19</sub>H<sub>19</sub>Br<sub>2</sub>NO<sub>2</sub>**

#### *Crystal Structure Report for Q\_0098\_HK\_AdBr*

A specimen of C<sub>19</sub>H<sub>19</sub>Br<sub>2</sub>NO<sub>2</sub>, approximate dimensions 0.256 mm x 0.312 mm x 0.452 mm, was used for the X-ray crystallographic analysis. The X-ray intensity data were measured.

The integration of the data using a triclinic unit cell yielded a total of 40110 reflections to a maximum  $\theta$  angle of 33.18° (0.65 Å resolution), of which 6439 were independent (average redundancy 6.229, completeness = 98.7%,  $R_{\text{int}}$  = 1.69%,  $R_{\text{sig}}$  = 1.07%) and 6143 (95.40%) were greater than  $2\sigma(F^2)$ . The final cell constants of  $a = 7.3485(3)$  Å,  $b = 8.0912(4)$  Å,  $c = 15.0118(7)$  Å,  $\alpha = 100.7690(10)^\circ$ ,  $\beta = 102.3410(10)^\circ$ ,  $\gamma = 93.5710(10)^\circ$ , volume = 851.72(7) Å<sup>3</sup>, are based upon the refinement of the XYZ-centroids of reflections above  $20\sigma(I)$ . The calculated minimum and maximum transmission coefficients (based on crystal size) are 0.7672 and 1.0000.

The structure was solved and refined using the Bruker SHELXTL Software Package, using the space group P -1, with  $Z = 2$  for the formula unit, C<sub>19</sub>H<sub>19</sub>Br<sub>2</sub>NO<sub>2</sub>. The final anisotropic full-matrix least-squares refinement on  $F^2$  with 217 variables converged at  $R1 = 1.61\%$ , for the observed data and  $wR2 = 4.13\%$  for all data. The goodness-of-fit was 1.088. The largest peak in the final difference electron density synthesis was 0.663 e/Å<sup>3</sup> and the largest hole was -0.346 e/Å<sup>3</sup> with an RMS deviation of 0.057 e/Å<sup>3</sup>. On the basis of the final model, the calculated density was 1.767 g/cm<sup>3</sup> and  $F(000)$ , 452 e<sup>-</sup>.

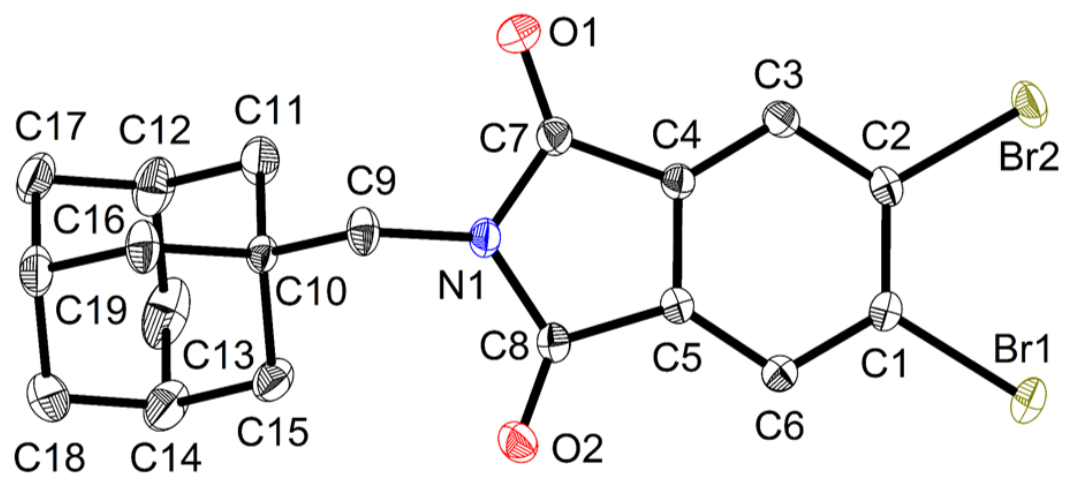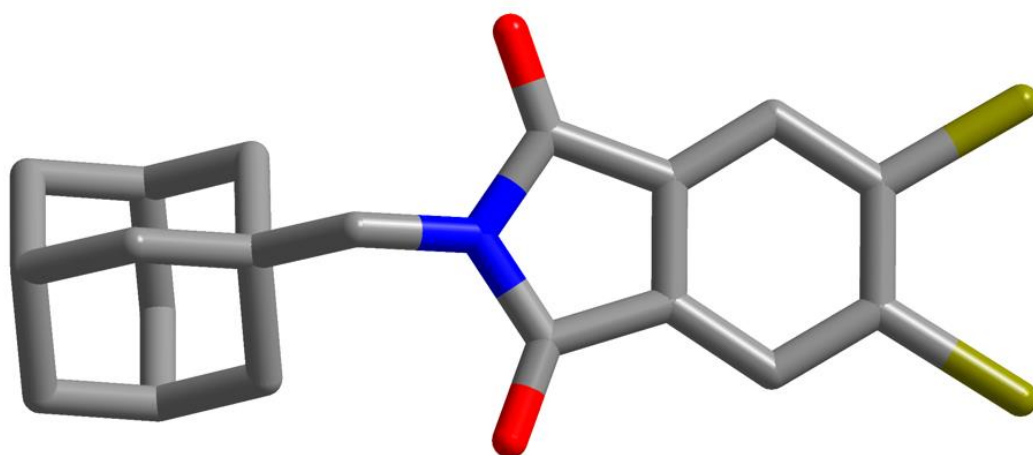

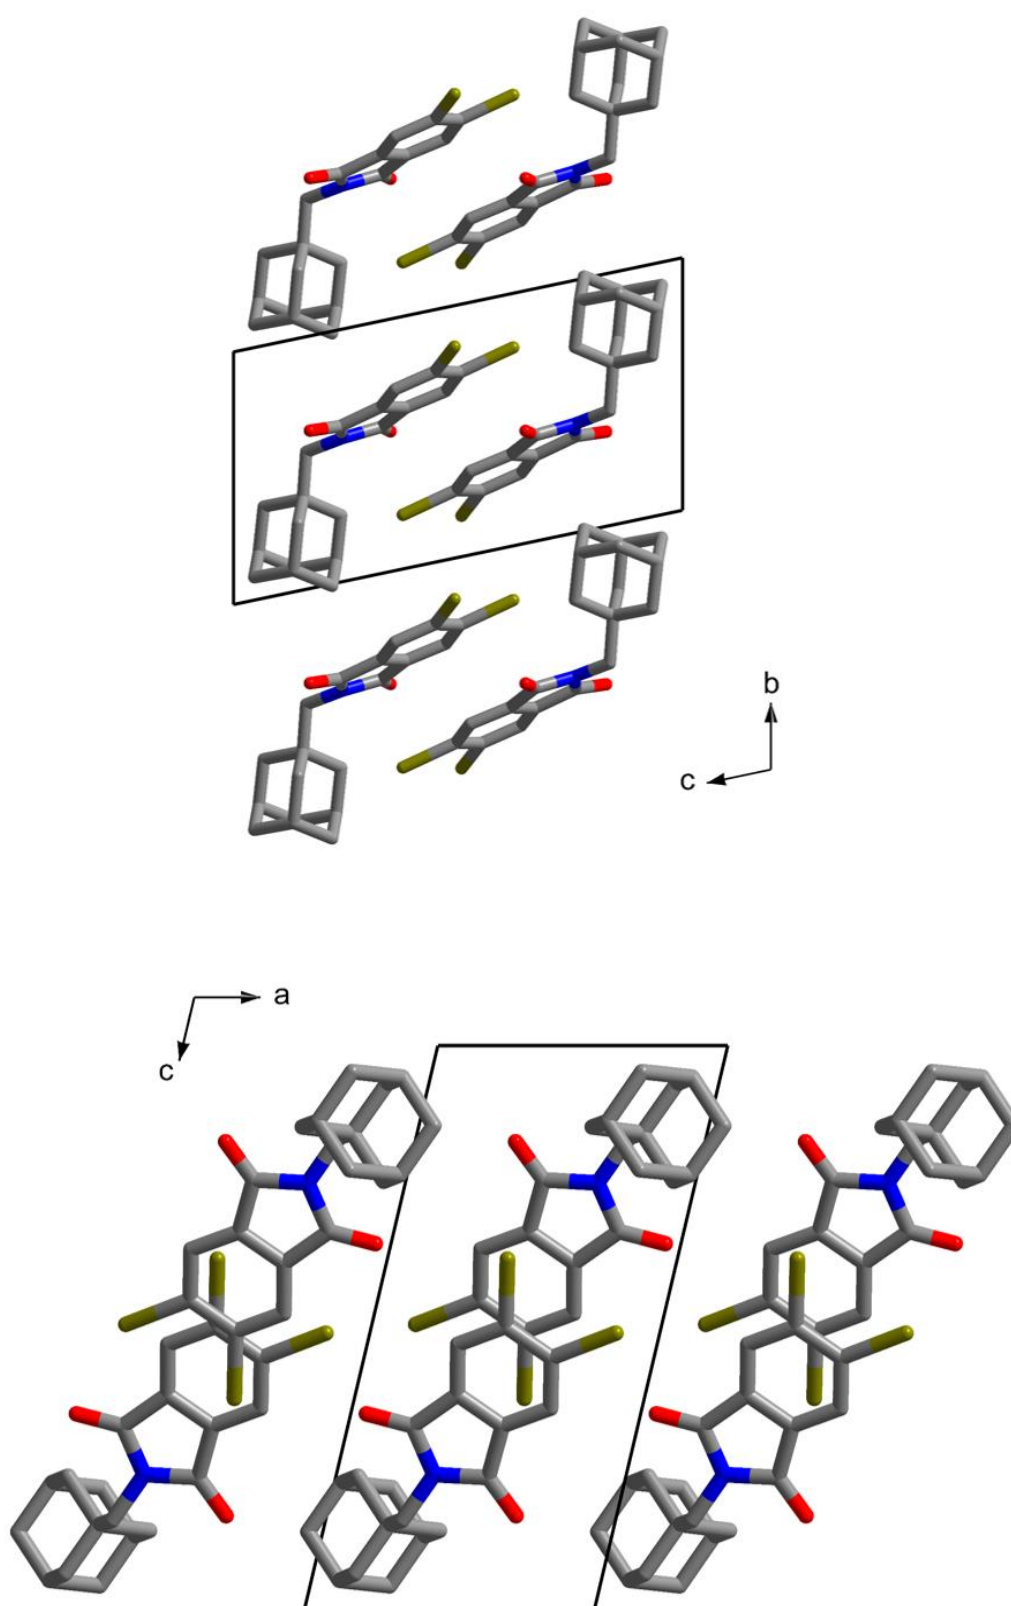

**Table 1.** Sample and crystal data for Q\_0098\_HK\_AdBr.

|                        |                                                                 |                   |  |
|------------------------|-----------------------------------------------------------------|-------------------|--|
| Identification code    | Q_0098_HK_XyBrAd                                                |                   |  |
| Chemical formula       | C <sub>19</sub> H <sub>19</sub> Br <sub>2</sub> NO <sub>2</sub> |                   |  |
| Formula weight         | 453.17 g/mol                                                    |                   |  |
| Temperature            | 100(2) K                                                        |                   |  |
| Wavelength             | 0.71073 Å                                                       |                   |  |
| Crystal size           | 0.256 x 0.312 x 0.452 mm                                        |                   |  |
| Crystal system         | triclinic                                                       |                   |  |
| Space group            | P -1                                                            |                   |  |
| Unit cell dimensions   | a = 7.3485(3) Å                                                 | α = 100.7690(10)° |  |
|                        | b = 8.0912(4) Å                                                 | β = 102.3410(10)° |  |
|                        | c = 15.0118(7) Å                                                | γ = 93.5710(10)°  |  |
| Volume                 | 851.72(7) Å <sup>3</sup>                                        |                   |  |
| Z                      | 2                                                               |                   |  |
| Density (calculated)   | 1.767 g/cm <sup>3</sup>                                         |                   |  |
| Absorption coefficient | 4.770 mm <sup>-1</sup>                                          |                   |  |
| F(000)                 | 452                                                             |                   |  |

**Table 2.** Data collection and structure refinement for Q\_0098\_HK\_AdBr.

|                                   |                                                                                     |                           |
|-----------------------------------|-------------------------------------------------------------------------------------|---------------------------|
| Theta range for data collection   | 3.42 to 33.18°                                                                      |                           |
| Index ranges                      | -11<=h<=11, -12<=k<=12, -23<=l<=23                                                  |                           |
| Reflections collected             | 40110                                                                               |                           |
| Independent reflections           | 6439 [R(int) = 0.0169]                                                              |                           |
| Max. and min. transmission        | 1.0000 and 0.7672                                                                   |                           |
| Structure solution technique      | direct methods                                                                      |                           |
| Structure solution program        | SHELXT-2014 (Sheldrick 2014)                                                        |                           |
| Refinement method                 | Full-matrix least-squares on F <sup>2</sup>                                         |                           |
| Refinement program                | SHELXL-2014 (Sheldrick 2014)                                                        |                           |
| Function minimized                | Σ w(F <sub>o</sub> <sup>2</sup> - F <sub>c</sub> <sup>2</sup> ) <sup>2</sup>        |                           |
| Data / restraints / parameters    | 6439 / 0 / 217                                                                      |                           |
| Goodness-of-fit on F <sup>2</sup> | 1.088                                                                               |                           |
| Δ/σ <sub>max</sub>                | 0.002                                                                               |                           |
| Final R indices                   | 6143 data; I>2σ(I)                                                                  | R1 = 0.0161, wR2 = 0.0406 |
|                                   | all data                                                                            | R1 = 0.0174, wR2 = 0.0413 |
| Weighting scheme                  | w=1/[σ <sup>2</sup> (F <sub>o</sub> <sup>2</sup> )+(0.0158P) <sup>2</sup> +0.4101P] |                           |
|                                   | where P=(F <sub>o</sub> <sup>2</sup> +2F <sub>c</sub> <sup>2</sup> )/3              |                           |
| Largest diff. peak and hole       | 0.663 and -0.346 eÅ <sup>-3</sup>                                                   |                           |
| R.M.S. deviation from mean        | 0.057 eÅ <sup>-3</sup>                                                              |                           |

**Table 3.** Atomic coordinates and equivalent isotropic atomic displacement parameters (Å<sup>2</sup>) for Q\_0098\_HK\_AdBr. (U(eq) is defined as one third of the trace of the orthogonalized U<sub>ij</sub> tensor.)

|     | x/a         | y/b         | z/c        | U(eq)       |
|-----|-------------|-------------|------------|-------------|
| Br1 | 0.58591(2)  | 0.21447(2)  | 0.62299(2) | 0.01510(2)  |
| Br2 | 0.15127(2)  | 0.16213(2)  | 0.49231(2) | 0.01569(3)  |
| O1  | 0.34660(10) | 0.37497(10) | 0.16986(5) | 0.01932(13) |
| O2  | 0.94584(9)  | 0.44529(9)  | 0.34972(5) | 0.01524(12) |
| N1  | 0.66304(11) | 0.43117(9)  | 0.24250(5) | 0.01154(12) |
| C1  | 0.53605(12) | 0.26853(10) | 0.50404(6) | 0.01088(13) |
| C2  | 0.35343(12) | 0.24502(10) | 0.44869(6) | 0.01099(13) |
| C3  | 0.31537(12) | 0.28185(11) | 0.35965(6) | 0.01171(13) |
| C4  | 0.46674(12) | 0.33939(10) | 0.32879(6) | 0.01065(13) |
| C5  | 0.64773(11) | 0.36354(10) | 0.38372(6) | 0.01024(13) |
| C6  | 0.68727(12) | 0.33123(11) | 0.47268(6) | 0.01144(13) |
| C7  | 0.47374(12) | 0.38227(11) | 0.23718(6) | 0.01229(14) |
| C8  | 0.77659(12) | 0.41934(10) | 0.32834(6) | 0.01095(13) |
| C9  | 0.73566(13) | 0.45557(11) | 0.16189(6) | 0.01323(14) |



|     | x/a         | y/b         | z/c        | U(eq)       |
|-----|-------------|-------------|------------|-------------|
| C10 | 0.77602(12) | 0.63953(10) | 0.15439(6) | 0.01047(13) |
| C11 | 0.59891(13) | 0.73175(12) | 0.14371(7) | 0.01691(16) |
| C12 | 0.64795(16) | 0.91420(13) | 0.13359(7) | 0.02065(18) |
| C13 | 0.7971(2)   | 0.00774(13) | 0.21929(8) | 0.0260(2)   |
| C14 | 0.97364(17) | 0.91590(13) | 0.22834(7) | 0.0227(2)   |
| C15 | 0.92349(14) | 0.73548(12) | 0.23955(6) | 0.01692(16) |
| C16 | 0.85540(14) | 0.63737(12) | 0.06731(6) | 0.01619(15) |
| C17 | 0.72568(15) | 0.90948(13) | 0.04614(7) | 0.01939(17) |
| C18 | 0.05144(16) | 0.91158(14) | 0.14127(8) | 0.0243(2)   |
| C19 | 0.90302(15) | 0.81863(13) | 0.05578(7) | 0.01812(16) |

Table 4. Bond lengths (Å) for Q\_0098\_HK\_AdBr.

| Br1-C1   | 1.8832(8)  | Br2-C2   | 1.8819(8)  |
|----------|------------|----------|------------|
| O1-C7    | 1.2104(11) | O2-C8    | 1.2107(10) |
| N1-C8    | 1.4009(11) | N1-C7    | 1.4036(11) |
| N1-C9    | 1.4629(11) | C1-C6    | 1.3987(12) |
| C1-C2    | 1.4000(12) | C2-C3    | 1.3975(12) |
| C3-C4    | 1.3802(12) | C3-H3    | 0.95       |
| C4-C5    | 1.3877(11) | C4-C7    | 1.4902(12) |
| C5-C6    | 1.3820(12) | C5-C8    | 1.4884(12) |
| C6-H6    | 0.95       | C9-C10   | 1.5291(12) |
| C9-H9A   | 0.99       | C9-H9B   | 0.99       |
| C10-C15  | 1.5309(12) | C10-C11  | 1.5339(13) |
| C10-C16  | 1.5389(12) | C11-C12  | 1.5406(14) |
| C11-H11A | 0.99       | C11-H11B | 0.99       |
| C12-C17  | 1.5348(14) | C12-C13  | 1.5359(17) |
| C12-H12  | 1.0        | C13-C14  | 1.5285(18) |
| C13-H13A | 0.99       | C13-H13B | 0.99       |
| C14-C18  | 1.5303(16) | C14-C15  | 1.5318(13) |
| C14-H14  | 1.0        | C15-H15A | 0.99       |
| C15-H15B | 0.99       | C16-C19  | 1.5363(13) |
| C16-H16A | 0.99       | C16-H16B | 0.99       |
| C17-C19  | 1.5291(15) | C17-H17A | 0.99       |
| C17-H17B | 0.99       | C18-C19  | 1.5300(15) |
| C18-H18A | 0.99       | C18-H18B | 0.99       |
| C19-H19  | 1.0        |          |            |

Table 5. Bond angles (°) for Q\_0098\_HK\_AdBr.

| C8-N1-C7  | 111.55(7) | C8-N1-C9   | 123.81(7) |
|-----------|-----------|------------|-----------|
| C7-N1-C9  | 123.41(7) | C6-C1-C2   | 121.28(8) |
| C6-C1-Br1 | 117.88(6) | C2-C1-Br1  | 120.84(6) |
| C3-C2-C1  | 121.31(8) | C3-C2-Br2  | 117.96(6) |
| C1-C2-Br2 | 120.74(6) | C4-C3-C2   | 116.69(8) |
| C4-C3-H3  | 121.7     | C2-C3-H3   | 121.7     |
| C3-C4-C5  | 122.07(8) | C3-C4-C7   | 129.64(8) |
| C5-C4-C7  | 108.28(7) | C6-C5-C4   | 121.97(8) |
| C6-C5-C8  | 129.84(8) | C4-C5-C8   | 108.15(7) |
| C5-C6-C1  | 116.65(8) | C5-C6-H6   | 121.7     |
| C1-C6-H6  | 121.7     | O1-C7-N1   | 125.38(8) |
| O1-C7-C4  | 128.73(8) | N1-C7-C4   | 105.88(7) |
| O2-C8-N1  | 125.43(8) | O2-C8-C5   | 128.43(8) |
| N1-C8-C5  | 106.11(7) | N1-C9-C10  | 115.57(7) |
| N1-C9-H9A | 108.4     | C10-C9-H9A | 108.4     |
| N1-C9-H9B | 108.4     | C10-C9-H9B | 108.4     |

|               |           |              |           |
|---------------|-----------|--------------|-----------|
| H9A-C9-H9B    | 107.4     | C9-C10-C15   | 110.61(7) |
| C9-C10-C11    | 112.26(7) | C15-C10-C11  | 109.55(7) |
| C9-C10-C16    | 107.32(7) | C15-C10-C16  | 108.37(7) |
| C11-C10-C16   | 108.61(7) | C10-C11-C12  | 109.66(8) |
| C10-C11-H11A  | 109.7     | C12-C11-H11A | 109.7     |
| C10-C11-H11B  | 109.7     | C12-C11-H11B | 109.7     |
| H11A-C11-H11B | 108.2     | C17-C12-C13  | 109.09(9) |
| C17-C12-C11   | 109.21(8) | C13-C12-C11  | 109.81(8) |
| C17-C12-H12   | 109.6     | C13-C12-H12  | 109.6     |
| C11-C12-H12   | 109.6     | C14-C13-C12  | 109.78(8) |
| C14-C13-H13A  | 109.7     | C12-C13-H13A | 109.7     |
| C14-C13-H13B  | 109.7     | C12-C13-H13B | 109.7     |
| H13A-C13-H13B | 108.2     | C13-C14-C18  | 109.60(9) |
| C13-C14-C15   | 108.81(9) | C18-C14-C15  | 110.15(9) |
| C13-C14-H14   | 109.4     | C18-C14-H14  | 109.4     |
| C15-C14-H14   | 109.4     | C10-C15-C14  | 110.34(7) |
| C10-C15-H15A  | 109.6     | C14-C15-H15A | 109.6     |
| C10-C15-H15B  | 109.6     | C14-C15-H15B | 109.6     |
| H15A-C15-H15B | 108.1     | C19-C16-C10  | 110.52(7) |
| C19-C16-H16A  | 109.5     | C10-C16-H16A | 109.5     |
| C19-C16-H16B  | 109.5     | C10-C16-H16B | 109.5     |
| H16A-C16-H16B | 108.1     | C19-C17-C12  | 109.42(8) |
| C19-C17-H17A  | 109.8     | C12-C17-H17A | 109.8     |
| C19-C17-H17B  | 109.8     | C12-C17-H17B | 109.8     |
| H17A-C17-H17B | 108.2     | C19-C18-C14  | 109.06(8) |
| C19-C18-H18A  | 109.9     | C14-C18-H18A | 109.9     |
| C19-C18-H18B  | 109.9     | C14-C18-H18B | 109.9     |
| H18A-C18-H18B | 108.3     | C17-C19-C18  | 110.21(9) |
| C17-C19-C16   | 109.30(8) | C18-C19-C16  | 108.96(8) |
| C17-C19-H19   | 109.5     | C18-C19-H19  | 109.5     |
| C16-C19-H19   | 109.5     |              |           |

**Table 6. Anisotropic atomic displacement parameters ( $\text{\AA}^2$ ) for Q\_0098\_HK\_AdBr.** (The anisotropic atomic displacement factor exponent takes the form:  $-2\pi^2 [h^2 a^{*2} U_{11} + \dots + 2 h k a^* b^* U_{12}]$ ).

|     | U <sub>11</sub> | U <sub>22</sub> | U <sub>33</sub> | U <sub>23</sub> | U <sub>13</sub> | U <sub>12</sub> |
|-----|-----------------|-----------------|-----------------|-----------------|-----------------|-----------------|
| Br1 | 0.01884(4)      | 0.01741(4)      | 0.01094(4)      | 0.00628(3)      | 0.00424(3)      | 0.00313(3)      |
| Br2 | 0.01350(4)      | 0.01853(4)      | 0.01773(4)      | 0.00578(3)      | 0.00822(3)      | -0.00029(3)     |
| O1  | 0.0169(3)       | 0.0264(4)       | 0.0123(3)       | 0.0059(3)       | -0.0014(2)      | -0.0039(3)      |
| O2  | 0.0107(3)       | 0.0177(3)       | 0.0193(3)       | 0.0075(2)       | 0.0045(2)       | 0.0018(2)       |
| N1  | 0.0133(3)       | 0.0125(3)       | 0.0095(3)       | 0.0034(2)       | 0.0036(2)       | -0.0004(2)      |
| C1  | 0.0133(3)       | 0.0106(3)       | 0.0098(3)       | 0.0031(2)       | 0.0038(3)       | 0.0020(3)       |
| C2  | 0.0114(3)       | 0.0103(3)       | 0.0124(3)       | 0.0023(3)       | 0.0053(3)       | 0.0004(2)       |
| C3  | 0.0107(3)       | 0.0123(3)       | 0.0118(3)       | 0.0022(3)       | 0.0026(3)       | -0.0001(3)      |
| C4  | 0.0112(3)       | 0.0110(3)       | 0.0097(3)       | 0.0022(2)       | 0.0025(3)       | 0.0001(3)       |
| C5  | 0.0104(3)       | 0.0101(3)       | 0.0106(3)       | 0.0024(2)       | 0.0032(2)       | 0.0008(2)       |
| C6  | 0.0109(3)       | 0.0123(3)       | 0.0114(3)       | 0.0034(3)       | 0.0024(3)       | 0.0013(3)       |
| C7  | 0.0136(3)       | 0.0121(3)       | 0.0106(3)       | 0.0022(3)       | 0.0024(3)       | -0.0012(3)      |
| C8  | 0.0121(3)       | 0.0100(3)       | 0.0118(3)       | 0.0033(3)       | 0.0042(3)       | 0.0014(3)       |
| C9  | 0.0193(4)       | 0.0107(3)       | 0.0110(3)       | 0.0015(3)       | 0.0074(3)       | 0.0002(3)       |
| C10 | 0.0130(3)       | 0.0104(3)       | 0.0084(3)       | 0.0020(2)       | 0.0036(3)       | 0.0003(3)       |
| C11 | 0.0164(4)       | 0.0194(4)       | 0.0191(4)       | 0.0093(3)       | 0.0073(3)       | 0.0051(3)       |
| C12 | 0.0271(5)       | 0.0179(4)       | 0.0223(4)       | 0.0104(3)       | 0.0098(4)       | 0.0096(4)       |
| C13 | 0.0498(7)       | 0.0118(4)       | 0.0179(4)       | 0.0032(3)       | 0.0105(4)       | 0.0050(4)       |
| C14 | 0.0336(5)       | 0.0138(4)       | 0.0156(4)       | 0.0045(3)       | -0.0035(4)      | -0.0077(4)      |
| C15 | 0.0231(4)       | 0.0127(3)       | 0.0121(3)       | 0.0038(3)       | -0.0017(3)      | -0.0035(3)      |
| C16 | 0.0225(4)       | 0.0154(4)       | 0.0135(4)       | 0.0035(3)       | 0.0099(3)       | 0.0015(3)       |

|     | U <sub>11</sub> | U <sub>22</sub> | U <sub>33</sub> | U <sub>23</sub> | U <sub>13</sub> | U <sub>12</sub> |
|-----|-----------------|-----------------|-----------------|-----------------|-----------------|-----------------|
| C17 | 0.0253(4)       | 0.0192(4)       | 0.0151(4)       | 0.0094(3)       | 0.0028(3)       | 0.0013(3)       |
| C18 | 0.0220(5)       | 0.0227(5)       | 0.0278(5)       | 0.0128(4)       | 0.0011(4)       | -0.0074(4)      |
| C19 | 0.0223(4)       | 0.0189(4)       | 0.0161(4)       | 0.0077(3)       | 0.0079(3)       | -0.0006(3)      |

**Table 7.** Hydrogen atomic coordinates and isotropic atomic displacement parameters ( $\text{\AA}^2$ ) for Q\_0098\_HK\_AdBr.

|      | x/a    | y/b    | z/c     | U(eq) |
|------|--------|--------|---------|-------|
| H3   | 0.1914 | 0.2680 | 0.3222  | 0.014 |
| H6   | 0.8109 | 0.3506 | 0.5106  | 0.014 |
| H9A  | 0.6440 | 0.3964 | 0.1047  | 0.016 |
| H9B  | 0.8529 | 0.4009 | 0.1640  | 0.016 |
| H11A | 0.5453 | 0.7336 | 0.1990  | 0.02  |
| H11B | 0.5041 | 0.6711 | 0.0880  | 0.02  |
| H12  | 0.5328 | 0.9748 | 0.1278  | 0.025 |
| H13A | 0.8278 | 1.1252 | 0.2129  | 0.031 |
| H13B | 0.7478 | 1.0124 | 0.2760  | 0.031 |
| H14  | 1.0699 | 0.9770 | 0.2844  | 0.027 |
| H15A | 1.0374 | 0.6754 | 0.2468  | 0.02  |
| H15B | 0.8743 | 0.7395 | 0.2963  | 0.02  |
| H16A | 0.9697 | 0.5778 | 0.0731  | 0.019 |
| H16B | 0.7621 | 0.5751 | 0.0115  | 0.019 |
| H17A | 0.6307 | 0.8493 | -0.0096 | 0.023 |
| H17B | 0.7551 | 1.0263 | 0.0383  | 0.023 |
| H18A | 1.0845 | 1.0284 | 0.1345  | 0.029 |
| H18B | 1.1662 | 0.8526 | 0.1470  | 0.029 |
| H19  | 0.9533 | 0.8149 | -0.0014 | 0.022 |

**Table 8.** Hydrogen bond distances ( $\text{\AA}$ ) and angles ( $^\circ$ ) for Q\_0098\_HK\_AdBr.

|             | Donor-H | Acceptor-H | Donor-Acceptor | Angle |
|-------------|---------|------------|----------------|-------|
| C3-H3...O2  | 0.95    | 2.43       | 3.0810(11)     | 125.5 |
| C6-H6...Br2 | 0.95    | 3.04       | 3.7265(8)      | 130.0 |
| C6-H6...O2  | 0.95    | 2.66       | 3.4879(11)     | 146.5 |
